# Supplementary material
Source: ML conference proceedings conference paper supplement (https://openreview.net/forum?id=vN9OBsZtYH)
Supplement: supplementary_material [file attachment]

## 399 A Proof of Lemma 1

400 *Proof.* By Eq.(1) we have

$$\hat{\text{TPR}}_a = (1 - \eta_{1a})\text{TPR}_a + \eta_{1a}\text{TPR}_{a'},$$

401

$$\hat{\text{TNR}}_a = (1 - \eta_{0a})\text{TNR}_a + \eta_{0a}\text{TNR}_{a'}.$$

402 And we have EÔd as

$$\text{EÔd} = |\hat{\text{TPR}}_0 - \hat{\text{TPR}}_1| + |\hat{\text{TNR}}_0 - \hat{\text{TNR}}_1| = (1 - \eta_{10} - \eta_{11})|\text{TPR}_0 - \text{TPR}_1| + (1 - \eta_{00} - \eta_{01})|\text{TNR}_0 - \text{TNR}_1|.$$

403 For  $\hat{\text{DI}}$ , we have the positive prediction rate under noisy data as follows:

$$\hat{\text{PR}}_a = \hat{\alpha}_a \hat{\text{TPR}}_a + (1 - \hat{\alpha}_a) \hat{\text{FPR}}_a,$$

404 where  $\hat{\alpha}_a = \frac{|\{i|\hat{a}_i=a, y_i=1\}|}{|\{i|\hat{a}_i=a\}|}$  is the noisy base rate of group  $a$ . Correspondingly, we have  $\hat{\text{DI}}$  as

$$\begin{aligned} \hat{\text{DI}} &= |\hat{\text{PR}}_0 - \hat{\text{PR}}_1| \\ &= |(1 - \hat{\alpha}_0)[(1 - \eta_{00})\text{FPR}_0 + \eta_{00}\text{FPR}_1] - (1 - \hat{\alpha}_1)[(1 - \eta_{01})\text{FPR}_1 + \eta_{01}\text{FPR}_0] \\ &\quad + \hat{\alpha}_0[(1 - \eta_{10})\text{TPR}_0 + \eta_{10}\text{TPR}_1] - \hat{\alpha}_1[(1 - \eta_{11})\text{TPR}_1 + \eta_{11}\text{TPR}_0]| \\ &= |[1 - (\hat{\alpha}_0 + \eta_{00}) + \hat{\alpha}_0\eta_{00} - \eta_{01} + \hat{\alpha}_1\eta_{01}]\text{FPR}_0 - [1 - (\hat{\alpha}_1 + \eta_{01}) + \hat{\alpha}_1\eta_{01} - \eta_{00} + \hat{\alpha}_0\eta_{00}]\text{FPR}_1 \\ &\quad + (\hat{\alpha}_0 - \hat{\alpha}_0\eta_{10} - \hat{\alpha}_1\eta_{11})\text{TPR}_0 - (\hat{\alpha}_1 - \hat{\alpha}_0\eta_{10} - \hat{\alpha}_1\eta_{11})\text{TPR}_1|. \end{aligned}$$

405

□

406 **Remark 1.** *There is no deterministic relationship between  $\hat{\text{DI}}$  and  $\text{DI}$  under group- and label-*  
407 *dependent flip. Specially, under group-dependent flip, i.e.,  $\eta_{ya} = \eta_{y'a} = \eta_a$ , we have*

$$\begin{aligned} \hat{\text{DI}} &= |[1 - (\hat{\alpha}_0 + \eta_0) + \hat{\alpha}_0\eta_0 - \eta_1 + \hat{\alpha}_1\eta_1]\text{FPR}_0 - [1 - (\hat{\alpha}_1 + \eta_1) + \hat{\alpha}_1\eta_1 - \eta_0 + \hat{\alpha}_0\eta_0]\text{FPR}_1 \\ &\quad + (\hat{\alpha}_0 - \hat{\alpha}_0\eta_0 - \hat{\alpha}_1\eta_1)\text{TPR}_0 - (\hat{\alpha}_1 - \hat{\alpha}_0\eta_0 - \hat{\alpha}_1\eta_1)\text{TPR}_1| \\ &= (1 - \eta_0 - \eta_1)\text{DI}, \end{aligned}$$

408 where the last equality is obtained by substituting  $\hat{\alpha}_a$  with  $\hat{\alpha}_a = (1 - \eta_a)\alpha_a + \eta_a\alpha_{a'}$ .

## 409 B Proof of Theorem 1

410 *Proof.* Since  $0 \leq (1 - \eta_{ya} - \eta_{ya'}) \leq 1$ , we have from Lemma 1 that  $\text{EÔd} \leq |\text{TPR}_0 - \text{TPR}_1| +$   
411  $|\text{TNR}_0 - \text{TNR}_1| = \text{EOd}$ . For the upper-bound, we have the following relationship regarding  $Q_{ya}$   
412 and  $\hat{Q}_{ya}$ :

$$Q_{ya} = \frac{1 - \eta_{ya'}}{1 - \eta_{ya} - \eta_{ya'}} \hat{Q}_{ya} + \frac{\eta_{ya}}{1 - \eta_{ya} - \eta_{ya'}} \hat{Q}_{ya'},$$

413 where  $a' = |1 - a|$ . Therefore we have the total variation distance between  $Q_{ya}$  and  $\hat{Q}_{ya}$  as follows:

$$\begin{aligned} \text{TV}(Q_{ya}, \hat{Q}_{ya}) &= \frac{1}{2} \int |Q_{ya} - \hat{Q}_{ya}| \\ &= \frac{1}{2} \int \left| \frac{1 - \eta_{ya'}}{1 - \eta_{ya} - \eta_{ya'}} \hat{Q}_{ya} + \frac{\eta_{ya}}{1 - \eta_{ya} - \eta_{ya'}} \hat{Q}_{ya'} - \hat{Q}_{ya} \right| \\ &= \frac{\eta_{ya}}{1 - \eta_{ya} - \eta_{ya'}} \text{TV}(\hat{Q}_{ya}, \hat{Q}_{ya'}). \end{aligned}$$

414 And we have the EOd under clean distribution as follows:

E<sub>Od</sub>

$$\begin{aligned}
&= |\text{TPR}_0 - \text{TPR}_1| + |\text{TNR}_0 - \text{TNR}_1| \\
&= \left| \int_{\frac{1}{2}}^1 Q_{10} - Q_{11} \right| + \left| \int_0^{\frac{1}{2}} Q_{00} - Q_{01} \right| \\
&= \left| \int_{\frac{1}{2}}^1 Q_{10} - \hat{Q}_{10} + \hat{Q}_{10} - Q_{11} + \hat{Q}_{11} - \hat{Q}_{11} \right| + \left| \int_0^{\frac{1}{2}} Q_{00} - \hat{Q}_{00} + \hat{Q}_{00} - Q_{01} - \hat{Q}_{01} + \hat{Q}_{01} \right| \\
&\leq \left| \int_{\frac{1}{2}}^1 \hat{Q}_{10} - \hat{Q}_{11} \right| + \left| \int_{\frac{1}{2}}^1 Q_{10} - \hat{Q}_{10} \right| + \left| \int_{\frac{1}{2}}^1 \hat{Q}_{11} - Q_{11} \right| + \left| \int_0^{\frac{1}{2}} \hat{Q}_{01} - Q_{01} \right| + \left| \int_0^{\frac{1}{2}} \hat{Q}_{00} - \hat{Q}_{01} \right| + \left| \int_0^{\frac{1}{2}} Q_{00} - \hat{Q}_{00} \right| \\
&\leq \text{E}\hat{\text{O}}\text{d} + \frac{\eta_{10} + \eta_{11}}{1 - \eta_{10} - \eta_{11}} 2TV(\hat{Q}_{10}, \hat{Q}_{11}) + \frac{\eta_{00} + \eta_{01}}{1 - \eta_{00} - \eta_{01}} 2TV(\hat{Q}_{00}, \hat{Q}_{01}) \\
&\leq \text{E}\hat{\text{O}}\text{d} + \frac{\eta_{10} + \eta_{11}}{1 - \eta_{10} - \eta_{11}} \sqrt{D_{KL}(\hat{Q}_{10}, \hat{Q}_{11})} + \frac{\eta_{00} + \eta_{01}}{1 - \eta_{00} - \eta_{01}} \sqrt{D_{KL}(\hat{Q}_{00}, \hat{Q}_{01})},
\end{aligned}$$

415 where the last inequality is due to  $TV(P, Q) \leq \sqrt{\frac{1}{2} D_{KL}(P \| Q)}$ . Since  $D_{KL}(\hat{P}_{ya}, \hat{P}_{ya'}) \leq \epsilon_y$ , we  
416 have the following upper- and lower-bound regarding E<sub>Od</sub> under clean distribution and E<sub>Od</sub> under  
417 noisy distribution:

$$\text{E}\hat{\text{O}}\text{d} \leq \text{E}\hat{\text{O}}\text{d} + \frac{\eta_{00} + \eta_{01}}{1 - \eta_{00} - \eta_{01}} \sqrt{\epsilon_0} + \frac{\eta_{10} + \eta_{11}}{1 - \eta_{10} - \eta_{11}} \sqrt{\epsilon_1}.$$

418

□

## 419 C Proof of Lemma 2

420 *Proof.* By Eq. (8) we have

$$\begin{aligned}
\widetilde{\text{TPR}}_a &= (1 - \eta_{1a})\text{TPR}_a + \eta_{1a}\text{FPR}_a, \\
\widetilde{\text{TNR}}_a &= (1 - \eta_{0a})\text{TNR}_a + \eta_{0a}\text{FNR}_a.
\end{aligned}$$

422 And we have the following relationship regarding  $\widetilde{\text{E}}\text{Od}$ :

$$\begin{aligned}
\widetilde{\text{E}}\text{Od} &= |(1 - \beta_{10})\text{TPR}_0 + \beta_{10}\text{FPR}_0 - (1 - \beta_{11})\text{TPR}_1 + \beta_{11}\text{FPR}_1| \\
&\quad + |(1 - \beta_{00})\text{TNR}_0 + \beta_{00}\text{FNR}_0 - (1 - \beta_{01})\text{TNR}_1 + \beta_{01}\text{FNR}_1| \\
&= |\text{TPR}_0 - \text{TPR}_1 + \beta_{10}(\text{FPR}_0 - \text{TPR}_0) - \beta_{11}(\text{FPR}_1 - \text{TPR}_1)| \\
&\quad + |\text{TNR}_0 - \text{TNR}_1 + \beta_{00}(\text{FNR}_0 - \text{TNR}_0) - \beta_{01}(\text{FNR}_1 - \text{TNR}_1)|
\end{aligned}$$

423 For  $\widetilde{\text{DI}}$ , we have

$$\begin{aligned}
\widetilde{\text{DI}} &= \left| \frac{(1 - \beta_{10})\text{TP}_0 + \beta_{00}\text{FP}_0 + (1 - \beta_{00})\text{FP}_0 + \beta_{10}\text{TP}_0}{\text{TP}_0 + \text{TN}_0 + \text{FP}_0 + \text{FN}_0} - \frac{(1 - \beta_{11})\text{TP}_1 + \beta_{01}\text{FP}_1 + (1 - \beta_{01})\text{FP}_1 + \beta_{11}\text{TP}_1}{\text{TP}_1 + \text{TN}_1 + \text{FP}_1 + \text{FN}_1} \right| \\
&= \left| \frac{\text{TP}_0 + \text{FP}_0}{\text{TP}_0 + \text{TN}_0 + \text{FP}_0 + \text{FN}_0} - \frac{\text{TP}_1 + \text{FP}_1}{\text{TP}_1 + \text{TN}_1 + \text{FP}_1 + \text{FN}_1} \right| = \text{DI}.
\end{aligned}$$

424

□

## 425 D Proof of Lemma 3

426 *Proof.* Let  $Q_{ya}$  be the distribution of predicted soft labels in the clean subgroup  $\{i | y_i = y, a_i = a\}$   
427 and  $\tilde{Q}_{ya}$  be the corresponding distribution in the noisy group, let  $\beta_{ya}$  be the label noise rate of  
428 subgroup  $\{i | \tilde{y}_i = y, a_i = a\}$ , we have

$$Q_{ya} = \frac{1 - \beta_{y'a}}{(1 - \beta_{ya} - \beta_{y'a})} \tilde{Q}_{ya} - \frac{\beta_{ya}}{(1 - \beta_{ya} - \beta_{y'a})} \tilde{Q}_{y'a}. \quad (9)$$

429 And we have EO<sub>p</sub> under clean data as follows:

$$\begin{aligned}
\text{EO}_p &= \left| \int_{\frac{1}{2}}^1 Q_{10} - \int_{\frac{1}{2}}^1 Q_{11} \right| \\
&= \left| \int_{\frac{1}{2}}^1 \frac{(1-\beta_{00})}{(1-\beta_{10}-\beta_{00})} \tilde{Q}_{10} - \frac{(1-\beta_{01})}{(1-\beta_{11}-\beta_{01})} \tilde{Q}_{11} + \frac{\beta_{11}}{(1-\beta_{11}-\beta_{01})} \tilde{Q}_{01} - \frac{\beta_{10}}{(1-\beta_{00}-\beta_{10})} \tilde{Q}_{00} \right| \\
&\leq \left| \frac{(1-\beta_{00})}{(1-\beta_{10}-\beta_{00})} \widetilde{\text{TPR}}_0 - \frac{(1-\beta_{01})}{(1-\beta_{11}-\beta_{01})} \widetilde{\text{TPR}}_1 \right| + \left| \frac{\beta_{11}}{(1-\beta_{11}-\beta_{01})} \widetilde{\text{FPR}}_1 - \frac{\beta_{10}}{(1-\beta_{00}-\beta_{10})} \widetilde{\text{FPR}}_0 \right| \\
&\leq \min \left\{ \left| \frac{(1-\beta_{00})}{(1-\beta_{10}-\beta_{00})}, \frac{(1-\beta_{01})}{(1-\beta_{11}-\beta_{01})} \right| \right\} \widetilde{\text{EO}}_p + \min \left\{ \left| \frac{\beta_{11}}{(1-\beta_{11}-\beta_{01})}, \frac{\beta_{10}}{(1-\beta_{00}-\beta_{10})} \right| \right\} \widetilde{\text{DFPR}} \\
&\quad + \left| \frac{(1-\beta_{00})}{(1-\beta_{10}-\beta_{00})} - \frac{(1-\beta_{01})}{(1-\beta_{11}-\beta_{01})} \right| (\widetilde{\text{TPR}}_a + \widetilde{\text{FPR}}_{\bar{a}}),
\end{aligned} \tag{10}$$

430 where  $a = 0$  if  $\frac{(1-\beta_{00})}{(1-\beta_{10}-\beta_{00})} \geq \frac{(1-\beta_{01})}{(1-\beta_{11}-\beta_{01})}$  and  $a = 1$  otherwise, and  $\bar{a} = |1-a|$ . And we have

431 DTNR as follows:

$$\begin{aligned}
\text{DTNR} &= \left| \int_0^{\frac{1}{2}} p_{00} - \int_0^{\frac{1}{2}} p_{01} \right| \\
&= \left| \int_0^{\frac{1}{2}} \frac{(1-\beta_{10})}{(1-\beta_{10}-\beta_{00})} \tilde{P}_{00} - \frac{(1-\beta_{11})}{(1-\beta_{11}-\beta_{01})} \tilde{P}_{01} + \frac{\beta_{01}}{(1-\beta_{11}-\beta_{01})} \tilde{P}_{11} - \frac{\beta_{00}}{(1-\beta_{00}-\beta_{10})} \tilde{P}_{10} \right| \\
&\leq \min \left\{ \left| \frac{(1-\beta_{10})}{(1-\beta_{10}-\beta_{00})}, \frac{(1-\beta_{11})}{(1-\beta_{11}-\beta_{01})} \right| \right\} \widetilde{\text{DTNR}} + \min \left\{ \left| \frac{\beta_{01}}{(1-\beta_{11}-\beta_{01})}, \frac{\beta_{00}}{(1-\beta_{00}-\beta_{10})} \right| \right\} \widetilde{\text{DFNR}} \\
&\quad + \left| \frac{(\beta_{00})}{(1-\beta_{10}-\beta_{00})} - \frac{(\beta_{01})}{(1-\beta_{11}-\beta_{01})} \right| (\widetilde{\text{TNR}}_{a'} + \widetilde{\text{FNR}}_{\bar{a}'}).
\end{aligned} \tag{11}$$

432 where  $a' = 0$  if  $\frac{(1-\beta_{10})}{(1-\beta_{10}-\beta_{00})} \geq \frac{(1-\beta_{11})}{(1-\beta_{11}-\beta_{01})}$  and 0 otherwise, and  $\bar{a}' = |1-a'|$ . Therefore we have

433 clean EO<sub>d</sub> as follows:

$$\begin{aligned}
\text{EO}_d &\leq \min \left\{ \frac{1}{1-\beta_{00}-\beta_{10}}, \frac{1}{1-\beta_{01}-\beta_{11}} \right\} \widetilde{\text{EO}}_d + \left| \frac{(1-\beta_{00})}{(1-\beta_{10}-\beta_{00})} - \frac{(1-\beta_{01})}{(1-\beta_{11}-\beta_{01})} \right| (\widetilde{\text{TPR}}_a + \widetilde{\text{FPR}}_{\bar{a}}) \\
&\quad + \left| \frac{(\beta_{00})}{(1-\beta_{10}-\beta_{00})} - \frac{(\beta_{01})}{(1-\beta_{11}-\beta_{01})} \right| (\widetilde{\text{TNR}}_{a'} + \widetilde{\text{FNR}}_{\bar{a}'} ) \\
&\leq \min \left\{ \frac{1}{1-\beta_{00}-\beta_{10}}, \frac{1}{1-\beta_{01}-\beta_{11}} \right\} \widetilde{\text{EO}}_d \\
&\quad + (2 + \widetilde{\text{EO}}_d) \max \left\{ \left| \frac{\beta_{00}}{1-\beta_{00}-\beta_{10}} - \frac{\beta_{01}}{1-\beta_{01}-\beta_{11}} \right|, \left| \frac{1-\beta_{00}}{1-\beta_{10}-\beta_{00}} - \frac{1-\beta_{01}}{1-\beta_{11}-\beta_{01}} \right| \right\} \\
&= \min \left\{ \frac{1}{1-\beta_{00}-\beta_{10}} + \beta, \frac{1}{1-\beta_{01}-\beta_{11}} + \beta \right\} \widetilde{\text{EO}}_d + 2\beta.
\end{aligned} \tag{12}$$

434  $\square$

## 435 E Results under different sensitive attributes

436 We also include results under different sensitive attributes. Specifically, we choose race as sensitive  
437 information for Adult dataset and sex as sensitive information for COMPAS dataset. Results are  
438 shown in Table 7-8. As shown in the tables, our method performs better or comparably than other  
439 methods under varied sensitive attributes, which validates the effectiveness of our method.

| Method                               | Accuracy          | Disparate Impact  | EOD               |
|--------------------------------------|-------------------|-------------------|-------------------|
| Baseline                             | 66.80 $\pm$ 0.34% | 19.64 $\pm$ 1.79% | 21.24 $\pm$ 2.17% |
| Inprocessing (Wang et al., 2022)     | 63.14 $\pm$ 0.49% | 12.25 $\pm$ 1.14% | 14.35 $\pm$ 1.22% |
| DLR (Celis et al., 2021)             | 63.34 $\pm$ 0.54% | 9.47 $\pm$ 1.24%  | 8.58 $\pm$ 1.63%  |
| FairExpec (Mehrotra and Celis, 2021) | 63.26 $\pm$ 1.45% | 9.83 $\pm$ 1.55%  | 10.17 $\pm$ 1.29% |
| CorScale (Lamy et al., 2019)         | 62.37 $\pm$ 0.77% | 11.23 $\pm$ 1.25% | 11.19 $\pm$ 1.75% |
| Ours                                 | 63.45 $\pm$ 0.42% | 7.57 $\pm$ 1.22%  | 6.54 $\pm$ 1.38%  |

Table 7: Experimental results on COMPAS dataset under sensitive attribute noise with *sex* as sensitive attribute. The noise rates are set as  $\eta_{00} = 0.2$ ,  $\eta_{01} = 0.1$ ,  $\eta_{10} = 0.3$ ,  $\eta_{11} = 0.2$ .

| Method                               | Accuracy          | Disparate Impact  | EOD               |
|--------------------------------------|-------------------|-------------------|-------------------|
| Baseline                             | 84.16 $\pm$ 0.45% | 13.31 $\pm$ 1.47% | 15.13 $\pm$ 1.24% |
| Inprocessing (Wang et al., 2022)     | 82.54 $\pm$ 0.73% | 10.26 $\pm$ 1.58% | 11.27 $\pm$ 1.64% |
| DLR (Celis et al., 2021)             | 81.57 $\pm$ 0.63% | 7.42 $\pm$ 1.36%  | 7.47 $\pm$ 1.18%  |
| FairExpec (Mehrotra and Celis, 2021) | 82.35 $\pm$ 0.49% | 8.63 $\pm$ 1.21%  | 8.15 $\pm$ 1.46%  |
| CorScale (Lamy et al., 2019)         | 80.84 $\pm$ 0.68% | 8.45 $\pm$ 1.16%  | 9.23 $\pm$ 1.58%  |
| Ours                                 | 82.14 $\pm$ 0.71% | 6.56 $\pm$ 1.14%  | 5.84 $\pm$ 1.27%  |

Table 8: Experimental results on Adult dataset under sensitive attribute noise with *race* as sensitive attribute. The noise rates are set as  $\eta_{00} = 0.15$ ,  $\eta_{01} = 0.1$ ,  $\eta_{10} = 0.1$ ,  $\eta_{11} = 0.3$ .
